# Supplementary material for: Journeys Beyond the Horizon
Source: Oxford University Press journal article supplement (doi:10.1093/ptj/81.11.1817), 2001-11-01
Supplement: mm_lecture_2001.pdf [file mm_lecture_2001.pdf]

Mary “Mollie” McMillan (1880-1959) is remembered as one of the pioneers of our profession and as the founding president of the American Physical Therapy Association. Born in Hyde Park, Massachusetts, she grew up and was educated in England, where she decided upon a career in physical therapy. As the first physical therapy aide to be sworn into service in World War I, she supervised the training of reconstruction aides and came to be known as “The Mother of Physical Therapy” in the US Army. Mary McMillan organized one of the first courses in physical therapy in this country at Reed College in Oregon, and she established the first physical therapy training center in China at Peiping Union Medical College. Her book, *Massage and Therapeutic Exercise*, was the first comprehensive text on physical therapy written by an American physical therapist. During World War II, she treated prisoners of war while enduring the rigors of Japanese internment camps in Manila and Shanghai. Not only did she devote her life to furthering the profession, but she bequeathed a large part of her estate to its future, providing for the establishment of scholarship funds for students in the field of physical therapy. Mary McMillan’s selfless devotion to the profession has served as the inspiration for generations of physical therapists, and the ideals and standards she envisioned at the founding of the Association are still the goals we seek today.

The Mary McMillan Lecture Award, established by the Board of Directors in 1963 to pay tribute to Mary McMillan, acknowledges and honors an APTA member who has made a distinguished contribution to the profession. The award provides an opportunity for the recipient to share his or her achievements and ideas with the membership through a special lecture at the APTA Annual Conference. Nominations for the award may be submitted by individual members and components of the Association. Recipients of the award are selected by the APTA Awards Committee, with members representing the APTA Committees on Practice, Education, and Research.

### Mary McMillan Lecture Award Recipients

|                                         |      |
|-----------------------------------------|------|
| Mildred O Elson, PT                     | 1964 |
| Catherine A Worthingham, PT, PhD, FAPTA | 1965 |
| Ruby Decker, PT                         | 1966 |
| Col Emma E Vogel, PT                    | 1967 |
| Helen Kaiser, PT                        | 1968 |
| Margaret Rood, PT                       | 1969 |
| None                                    | 1970 |
| Lucy Blair, PT                          | 1971 |
| Margaret Knott, PT                      | 1972 |
| Lucille Daniels, PT                     | 1973 |
| None                                    | 1974 |
| Helen J Hislop                          | 1975 |
| E Jane Carlin, PT, DSc                  | 1976 |
| Mary Clyde Singleton, PT, PhD           | 1977 |
| Margaret L Moore, PT, EdD               | 1978 |
| Helen Blood, PT, EdD, FAPTA             | 1979 |
| Florence P Kendall, PT, FAPTA           | 1980 |
| Susanne Hirt, PT, PhD                   | 1981 |
| Dorothy E Voss                          | 1982 |
| Nancy T Watts, PT, PhD, FAPTA           | 1983 |
| Eugene Michels, PT, FAPTA               | 1984 |
| Geneva R Johnson, PT, PhD, FAPTA        | 1985 |
| Dorothy Pinkston, PT, PhD, FAPTA        | 1986 |
| Charles M Magistro, PT, FAPTA           | 1987 |
| None                                    | 1988 |
| Ruth Wood, PT, FAPTA                    | 1989 |
| L Don Lehmkuhl, PT, PhD, FAPTA          | 1990 |
| Robert C Bartlett, PT, FAPTA            | 1991 |
| Marylou R Barnes, PT, EdD, FAPTA        | 1992 |
| Gary L Soderberg, PT, PhD, FAPTA        | 1993 |
| None                                    | 1994 |
| None                                    | 1995 |
| Bella Jay May, PT, EdD, FAPTA           | 1996 |
| None                                    | 1997 |
| Shirley A Sahrman, PT, PhD, FAPTA       | 1998 |
| Suzann K Campbell, PT, PhD, FAPTA       | 1999 |
| Ruth B Purtilo, PT, PhD, FAPTA          | 2000 |
| Jules M Rothstein, PT, PhD, FAPTA       | 2001 |
