# Supplementary material for: Journeys Beyond the Horizon
Source: Oxford University Press journal article supplement (doi:10.1093/ptj/81.11.1817), 2001-11-01
Supplement: ptj_82_11_1817_mcmillanlecture.docx [file ptj_82_11_1817_mcmillanlecture.docx]

## About the Mary McMillan Lecture

**Files in this Data Supplement:**

- [About the Mary McMillan Lecture](file:///y:\Content_Analysis\Physical%20Therapy\Supplements\ptjournal.view\82\11\1108\dc1\82.11.1108.DC1\MM_Lecture_2002.pdf)
